# Supplementary material for: First-Principles Study of Cu-Based Inorganic Hole Transport Materials for Solar Cell Applications
Source: MDPI journal article supplement (doi:10.3390/ma15165703), 2022-08-18
Supplement: s1 [file s1]

# Supporting Information to

## First principles study of Cu-based inorganic hole transport materials for application in solar cells

Adriana Pecoraro,<sup>a</sup> Pasqualino Maddalena,<sup>a</sup> Michele Pavone<sup>b</sup>  
and Ana B. Muñoz García,<sup>\*a</sup>

<sup>a</sup>Department of Physics "Ettore Pancini", University of Naples Federico II

<sup>b</sup>Department of Chemical Sciences, University of Naples Federico II

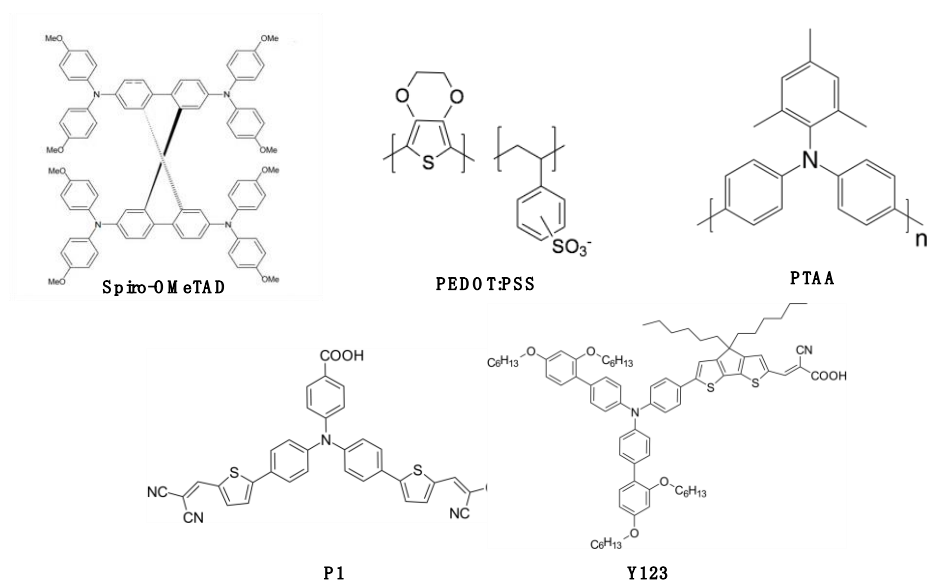

**Figure S1:** Schematic chemical structures of Spiro-OMeTAD, PEDOT:PSS, PTAA and P1 and Y123 dyes mentioned in this work.

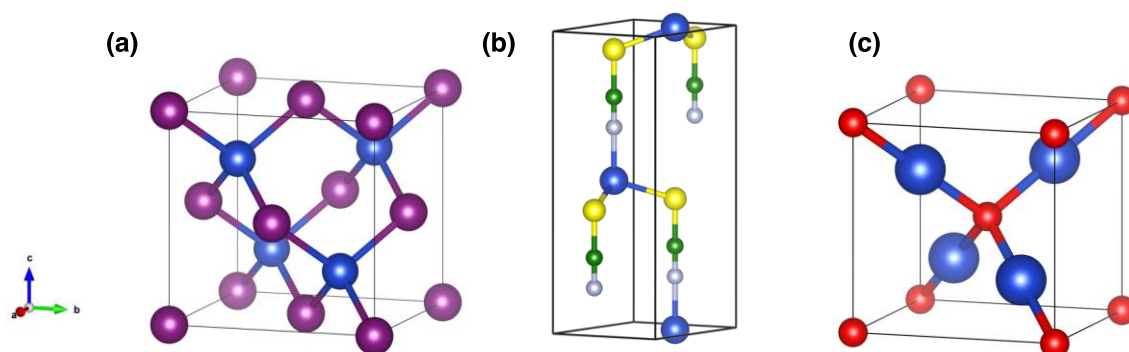

**Figure S2:** Bulk models shown before relaxation of (a) unit cell of cubic CuI, (b) unit cell hexagonal CuSCN and (c) unit cell of cubic Cu<sub>2</sub>O. Color label for atomic spheres: Cu - dark blue; I – violet; S – yellow; C – brown; N – light blue; O – red.

**Table S1:** Lattice constants of CuI, CuSCN and Cu<sub>2</sub>O calculated within the PBE+U level of theory. Experimental values are reported for comparison in the last column.

|                        | Lattice constant (Å) | This work | Exp                 |
|------------------------|----------------------|-----------|---------------------|
| <b>CuI</b>             | <i>a</i>             | 6.003     | 6.058 <sup>1</sup>  |
| <b>CuSCN</b>           | <i>a</i>             | 3.831     | 3.850               |
|                        | <i>c</i>             | 10.883    | 10.938 <sup>2</sup> |
| <b>Cu<sub>2</sub>O</b> | <i>a</i>             | 4.234     | 4.270 <sup>3</sup>  |

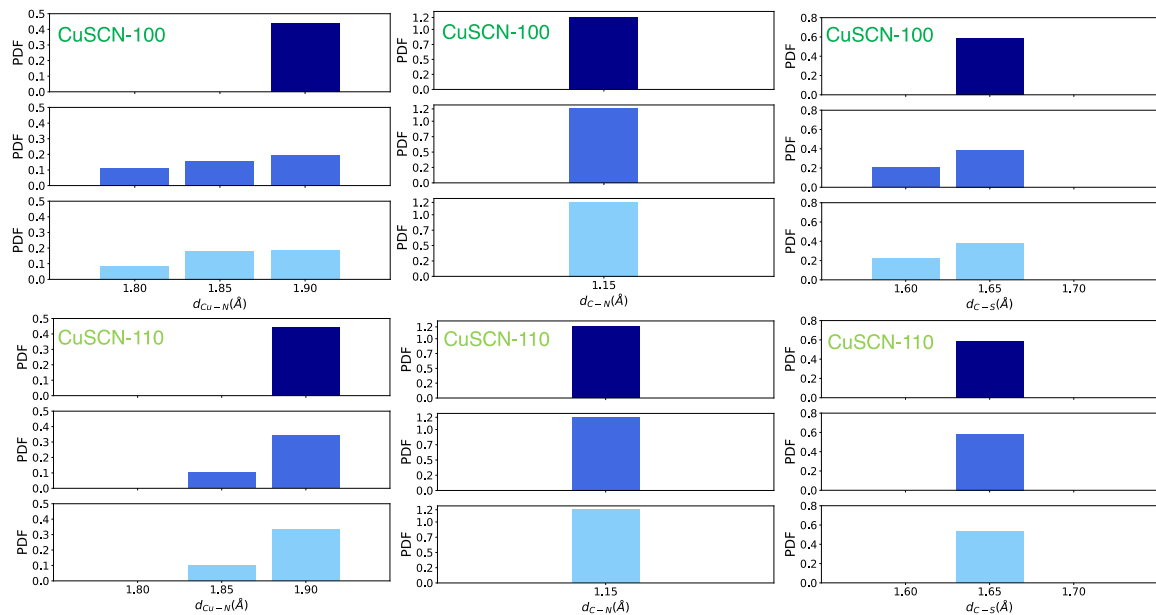

**Figure S3:** Pair distribution functions of, from left to right: Cu-N, C-N and C-S distances for the CuSCN-100 surface slabs (upper panel ) and CuSCN-110 surface slabs (lower panel). Dark blue color is used for structures before relaxation while medium and light blue refer to the pristine and the defective optimized structures, respectively.

## References

- <sup>1</sup> M. Yashima, Q. Xu, A. Yoshiasa, and S. Wada, J. Mater. Chem. **16**, 4393 (2006).
- <sup>2</sup> D.L. Smith and V.I. Saunders, Acta Cryst B **38**, 907 (1982).
- <sup>3</sup> A. Sanson, F. Rocca, G. Dalba, P. Fornasini, R. Grisenti, M. Dapiaggi, and G. Artioli, Phys. Rev. B **73**, 214305 (2006).
